# Supplementary material
Source: Elsevier journal article supplement (https://www.sciencedirect.com/science/article/pii/S113835932100143X)
Supplement: mmc1 [file S113835932100143X:mmc1.doc]

**ANEXO 1. ENCUESTA**

Centro de Salud:

Edad:

Género:

Nivel de estudios:

Situación laboral:

¿Fue confundido/a con otro/a paciente?. En caso afirmativo: ¿Este hecho tuvo consecuencias?

¿Cree usted que hay colaboración y comunicación entre el personal sanitario que lo atiende y usted y sus familiares?

¿Se atreve a preguntar al personal sanitario todas las dudas que tiene?

¿El personal sanitario contestó de forma clara y comprensible a sus preguntas?

¿Cree usted que ha sufrido un error clínico en su Centro de Salud? En caso afirmativo: ¿Se detectó rápidamente el error y se solucionó?

¿Le han prescrito medicación equivocada? En caso afirmativo: ¿Fue resuelto el error rápidamente? En caso afirmativo: A consecuencia de esto ¿tuvo alguna reacción, efecto adverso, alergia, etc?

¿Se le pidió opinión respecto a sus cuidados y tratamiento, habiendo sido informado/a antes?

¿El personal sanitario respetó su confidencialidad en el Centro de Salud?

¿Qué considera usted que es la seguridad del paciente en Atención Primaria?

Enumere uno o dos aspectos positivos de la seguridad del paciente:

Enumere uno o dos aspectos negativos de la seguridad del paciente:

Sugiera una o dos propuestas de mejora en cuanto a seguridad del paciente en Atención Primaria
